# Supplementary material
Source: Elsevier journal article supplement (https://www.sciencedirect.com/science/article/pii/S2603647921000348)
Supplement: mmc1 [file S2603647921000348:mmc1.doc]

**ANEXO 1*.* Encuestas neurofibromatosis tipo 1**

*ENCUESTA A PADRES/TUTORES DE NIÑOS VALORADOS EN EL HOSPITAL INFANTIL CON SOSPECHA O DIAGNÓSTICO DE NEUROFIBROMATOSIS TIPO 1*

**SU OPINIÓN ES IMPORTANTE**

- Desde el Hospital consideramos su participación muy importante.
- Para preservar la confidencialidad se realizará el estudio de forma anónima.
- No existen respuestas correctas e incorrectas.
- Marcar con una X la respuesta que usted considere más cercana a lo que piensa.
- Al final encontrará una hoja donde añadir sus sugerencias y/o propuestas de mejora.
- Nos hallamos a su disposición para aclarar sus dudas en:
  - - - - Teléfono: xxxxxxxxxxxxx
        - E-mail:xxxxx@xxx.com

*□*

1. *Fecha de nacimiento de su hijo: __/__/____*
2. *Fecha de la sospecha o diagnóstico de NEUROFIBROMATOSIS TIPO 1 de su hijo:*

*Mes/año (aproximado): …………………………………………………………………………………*

1. *Fecha de entrega aproximada de la Hoja de Información sobre “NEUROFIBROMATOSIS 1 en niños. Información para padres y pediatras”*

*Mes/año (aproximado):………………………………………………………………………………*

1. *¿Conserva la hoja de información?*

| *SI* | *NO* |
| --- | --- |

*Indique el grado de satisfacción acerca de la HOJA DE INFORMACIÓN SOBRE NEUROFIBROMATOSIS TIPO 1 sobre los aspectos que se exponen a continuación siguiendo esta escala.*

| ***1***  ***Muy insatisfecho*** | ***2***  ***Insatisfecho*** | ***3***  ***Ni insatisfecho ni satisfecho*** | ***4***  ***Satisfecho*** | ***5***  ***Muy satisfecho*** |
| --- | --- | --- | --- | --- |

1. *Sobre la Información recibida acerca del “NEUROFIBROMATOSIS TIPO 1”, considera que gracias a la hoja de información le han quedado claros los conceptos acerca del problema o patología de su hijo/a:*

| *1* | *2* | *3* | *4* | *5* |
| --- | --- | --- | --- | --- |

1. *Sobre la utilidad de la Hoja de Información recibida acerca de “NEUROFIBROMATOSIS TIPO 1” en la consulta de Neuropediatría:*

| *1* | *2* | *3* | *4* | *5* |
| --- | --- | --- | --- | --- |

1. *Sobre la claridad y fácil entendimiento de la Hoja de Información recibida acerca de “NEUROFIBROMATOSIS TIPO 1” en la consulta de Neuropediatría:*

| *1* | *2* | *3* | *4* | *5* |
| --- | --- | --- | --- | --- |

1. *¿Le explica claramente la hoja de información el seguimiento que va a llevar/está llevado su hijo?*

| *SI* | *NO* |
| --- | --- |

1. *¿Considera que falta en la hoja algún tipo de información que pudiera ser relevante conocer?*

| *SI* | *NO* |
| --- | --- |

- *En caso afirmativo ¿Cuál?*

*................................................................................................................................................................................................................................................................*

1. *¿Ha compartido con los responsables del niño la hoja de información? Marque con una cruz en caso afirmativo:*

*□ Pediatra de atención primaria*

*□ Profesores*

*□ Familiares*

*□ Centros de apoyo*

*□ Otros: ...............................*

1. *Valore de manera global (verbal y/o escrita) la información recibida acerca del problema o patología de su hijo/a en la consulta de Neuropediatría:*

| *1* | *2* | *3* | *4* | *5* |
| --- | --- | --- | --- | --- |

***Sugerencias/Comentarios:****………………………………………………………………………………………………………………………………………………………………………………*

Si lo cree conveniente puede añadir lo mejor y lo peor que ha encontrado acerca de la Hoja de Información recibida acerca de la “ Neurofibromatosis en niños” en la consulta de Neuropediatría:

Lo mejor ha sido…………………………………………………………………………………...

……………………………………………………………………………………………………..

Lo peor ha sido…………………………………………………………………………….............

……………………………………………………………………………………………………...
